# Supplementary material for: Dexmedetomidine Attenuates Orthotopic Liver Transplantation-Induced Acute Gut Injury via α2-Adrenergic Receptor-Dependent Suppression of Oxidative Stress
Source: Oxid Med Cell Longev. 2019 Nov 11;2019:9426368. doi: 10.1155/2019/9426368 (PMC6885230; doi:10.1155/2019/9426368)
Supplement: Supplementary Materials — Figure S1: entire blot lanes including molecular weight markers for all cropped Western blot bands shown in the main body of the manuscript. The lanes in the rectangle are the exact ones in the main figure. Figure S2: efficiency of siRNA transfection in IEC-6 cells. Six hours after transfection of fluorescent-labeled NC-siRNA-FAM, the cells were observed under a fluorescence microscope. The IEC-6 cells which were successfully transfected would release green fluorescence and those unsuccessfully transfected would release no green fluorescence. Red arrow: successfully transfected cells. White arrow: unsuccessfully transfected cells. [file 9426368.f1.docx]

**Dexmedetomidine Attenuates Orthotopic Liver Transplantation-Induced Acute** **Gut Injury via α2-Adrenergic Receptor-dependent Suppression of Oxidative Stress**

Peibiao Lv1*; Tufeng Chen2*; Peibin Liu3*; Lei Zheng3; Jingling Tian3; Fan Tan3; Jiaxin Chen3; Yingqing Deng3; Jun Li1+; Jun Cai4+; Xinjin Chi3,4+;

1Department of General Surgery, the Third Affiliated Hospital of Sun Yat-Sen University, Yuedong Hospital. Meizhou, Guangdong, 514700, P.R. China.

2Department of Gastroenterological Surgery, The Third Affiliated Hospital of Sun Yat‑sen University, Guangzhou, Guangdong 510630, P.R. China

3Department of Anesthesiology, The Seventh Affiliated Hospital of Sun Yat‑sen University, Shenzhen, Guangdong 518017, P.R. China

4Department of Anesthesiology, The Third Affiliated Hospital of Sun Yat‑sen University, Guangzhou, Guangdong 510630, P.R. China


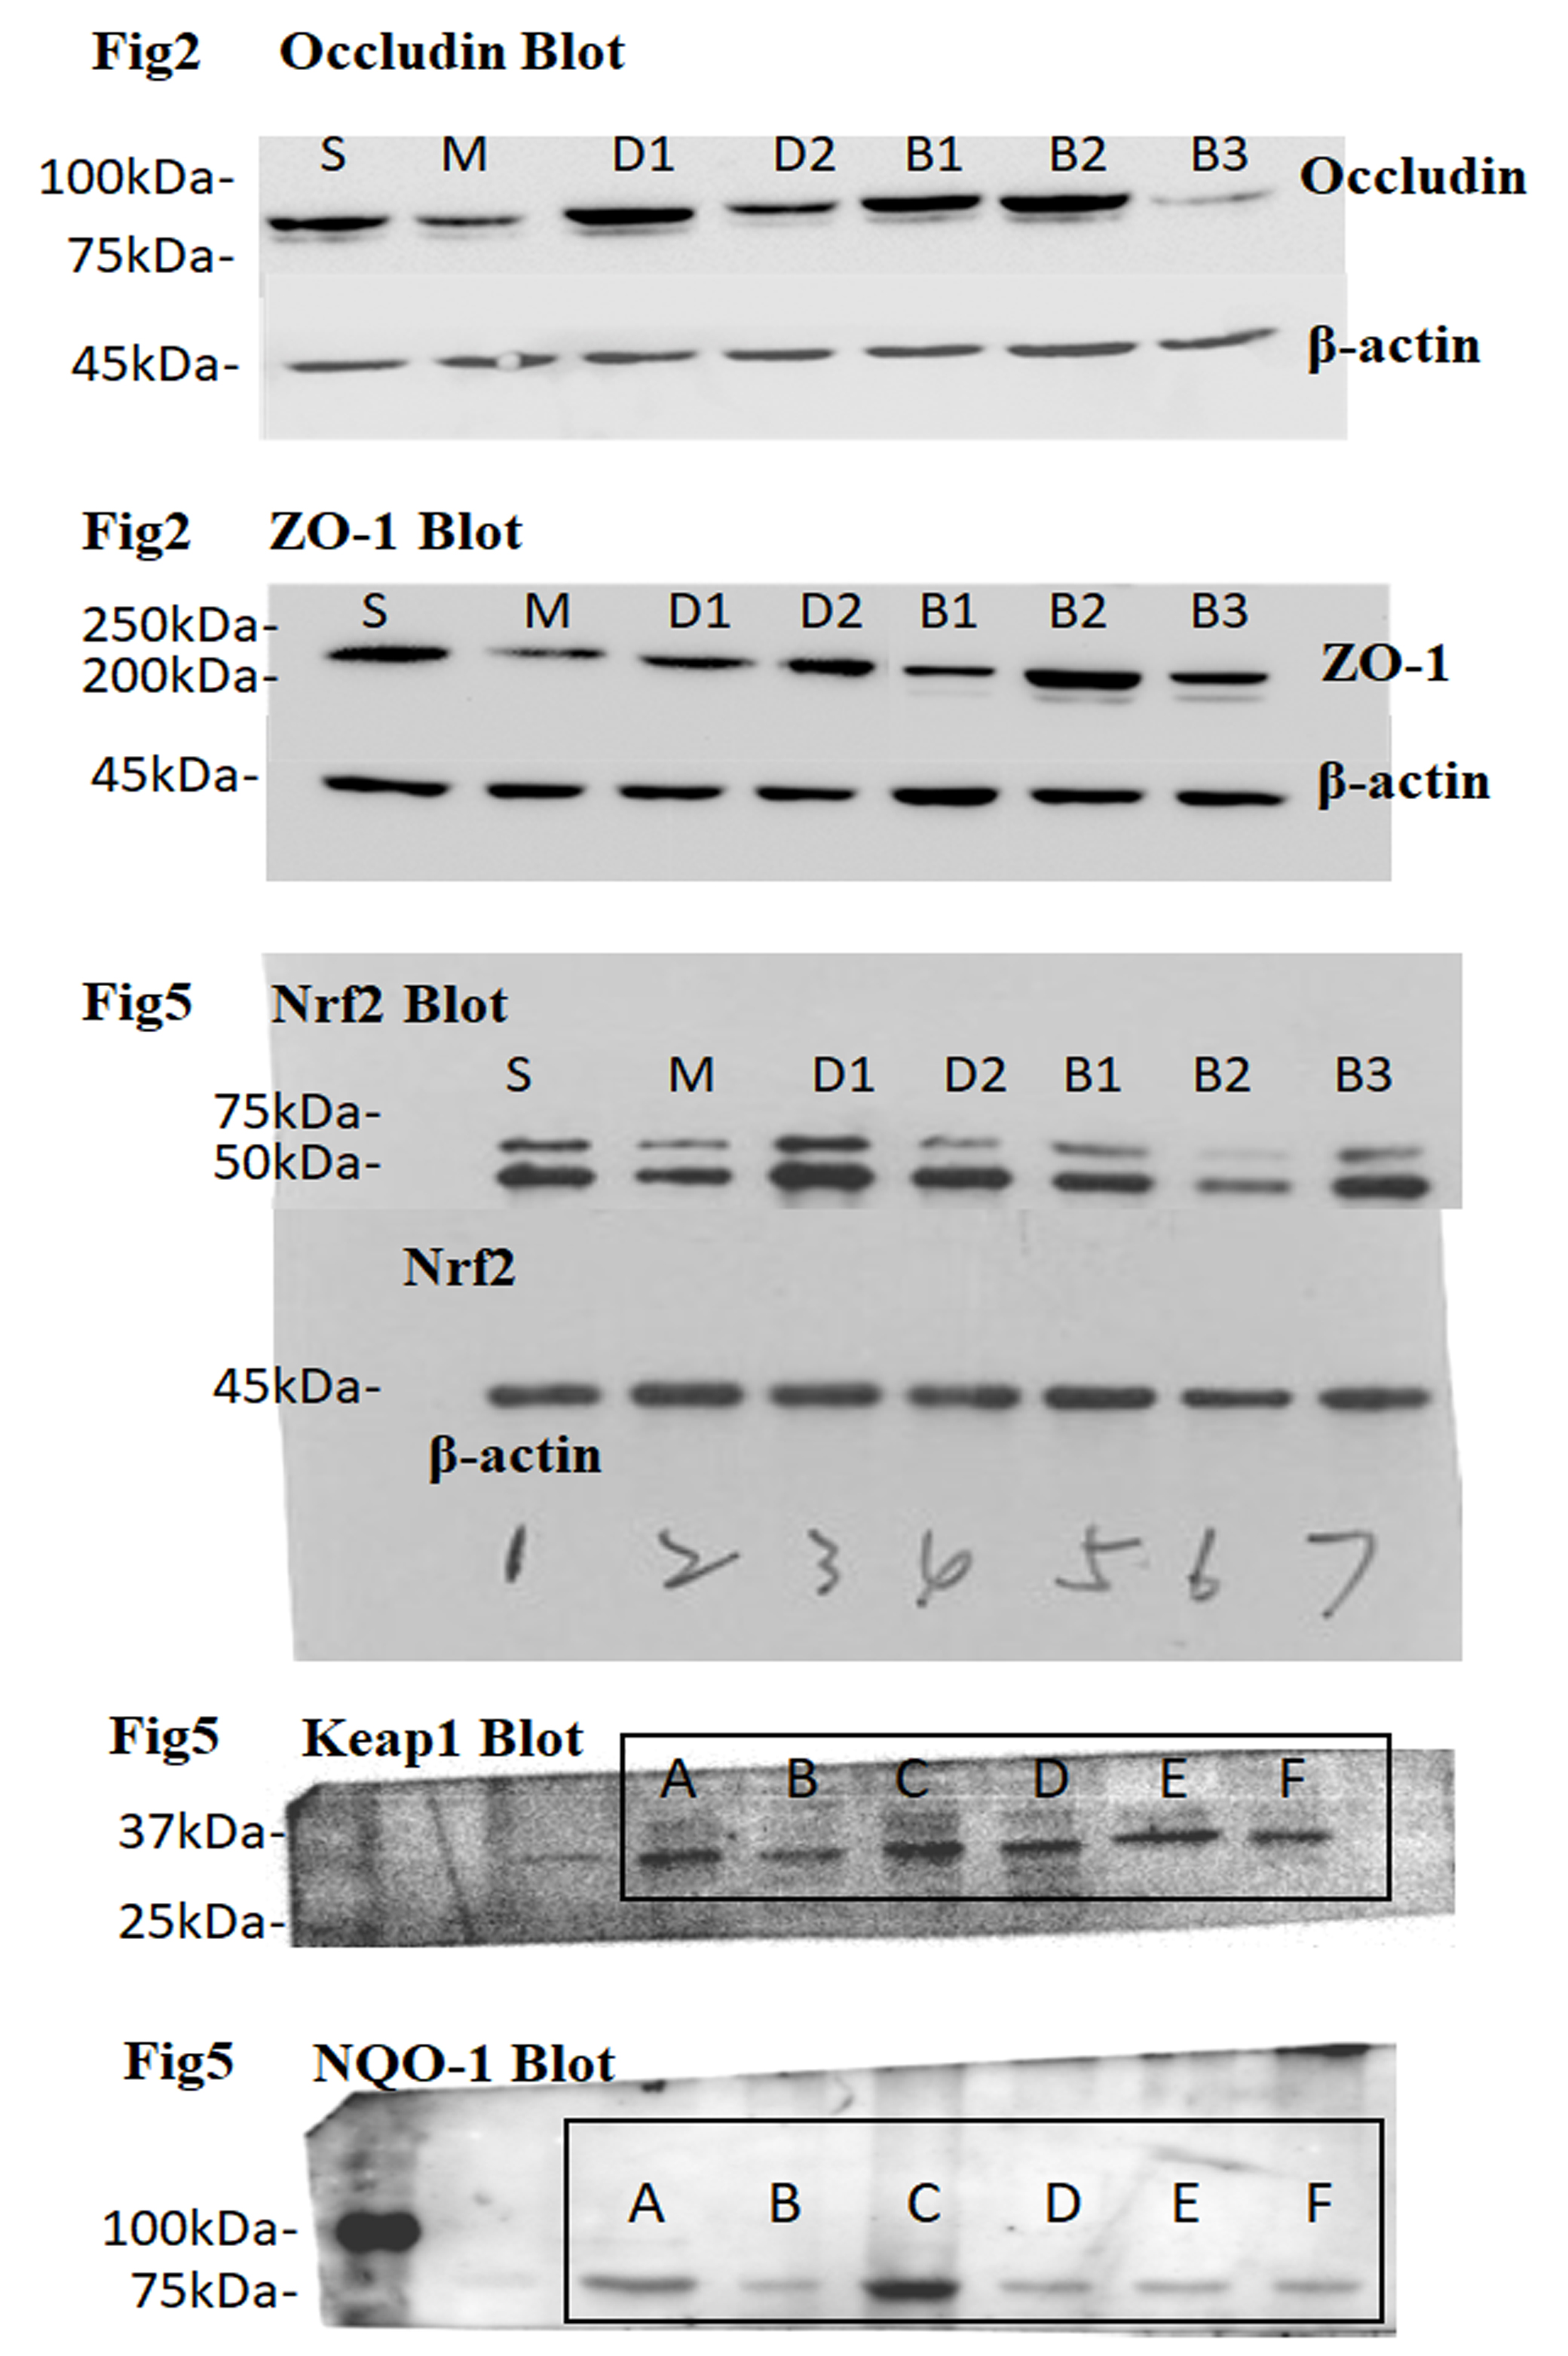


**Figure S1** **Entire blot lanes including molecular weight markers for all cropped Western blot bands shown in the main body of the manuscript.** The lanes in the rectangle are the exact ones in the main figure.


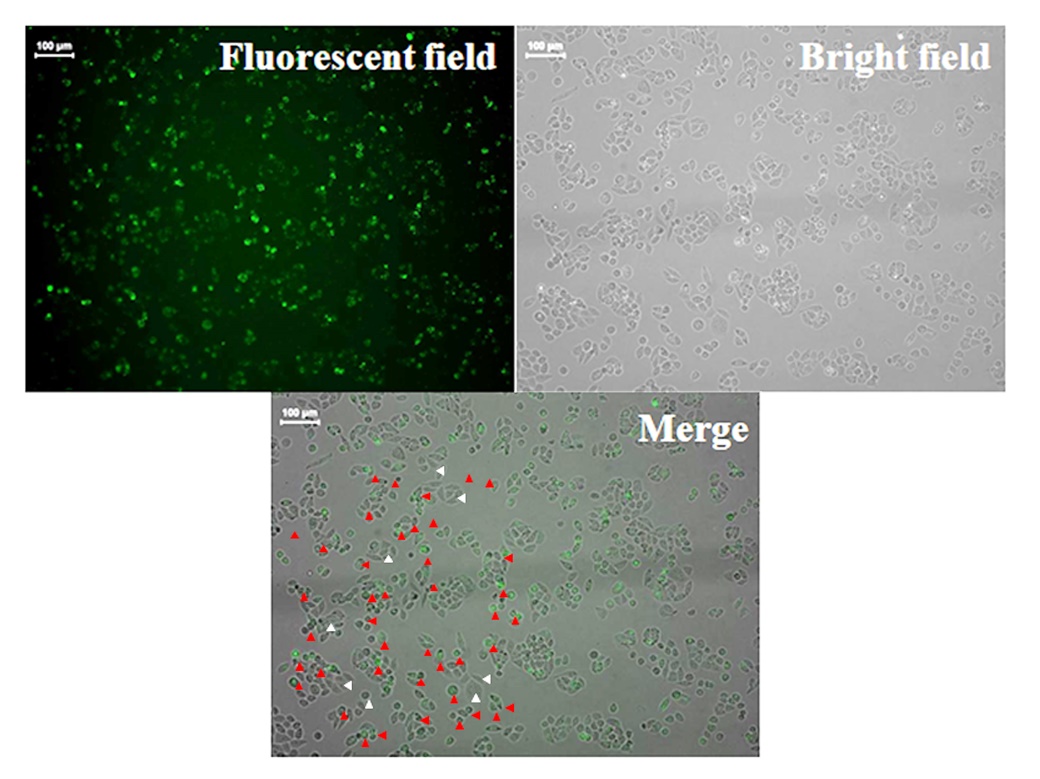


**Figure S2 Efficiency of siRNA transfection in IEC-6 cells.** Six hours after transfection of fluorescent labeled NC siRNA-FAM, the cells were observed under fluorescence microscope. The IEC-6 cells which successfully transfected would release green fluorescence and those unsuccessfully transfected release no green fluorescence. Red arrow: successfully transfected cells; White arrow: unsuccessfully transfected cells.
